# Supplementary material for: Methanolic Extract of Lysimachia Candida Lindl. Prevents High-Fat High-Fructose-Induced Fatty Liver in Rats: Understanding the Molecular Mechanism Through Untargeted Metabolomics Study
Source: PubMed Central journal article supplement (PMC8082144; doi:10.3389/fphar.2021.653872), 2021-04-15
Supplement: image3.pdf [file image3.pdf]

**FIGURE S3A-S3I** | MS-MS of major phytoconstituents identified from the plant extract.

Compound 5.67\_187.0634n (trans-3-Indoleacrylic acid)

Help

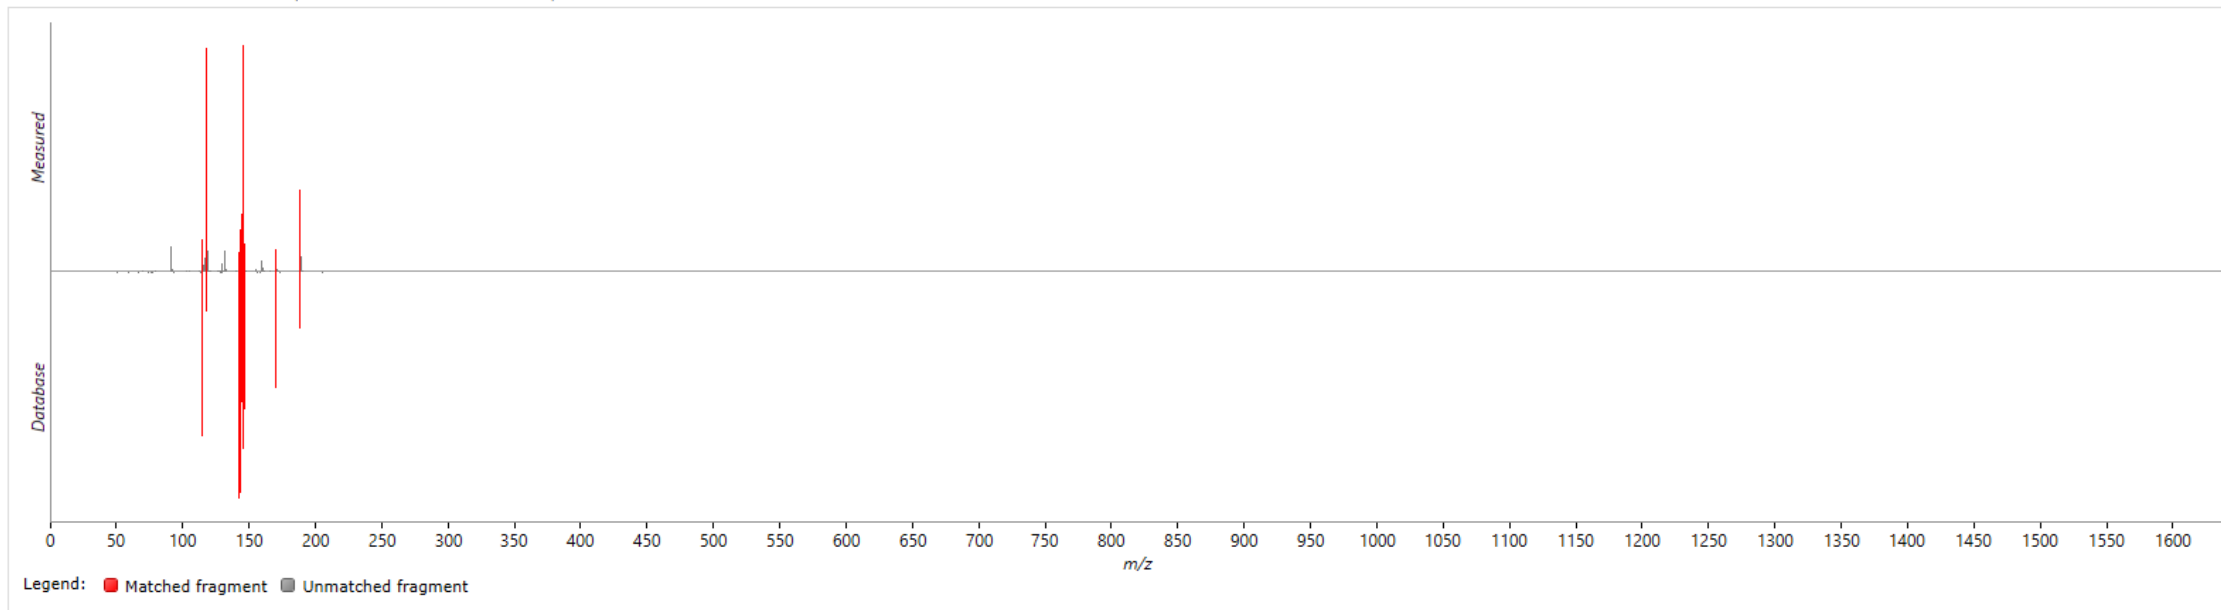

**FIGURE S3A** | MS-MS of trans-3-Indoleacrylic acid.

Compound 4.61\_165.0791n (L-phenylalanine)

Help ▾

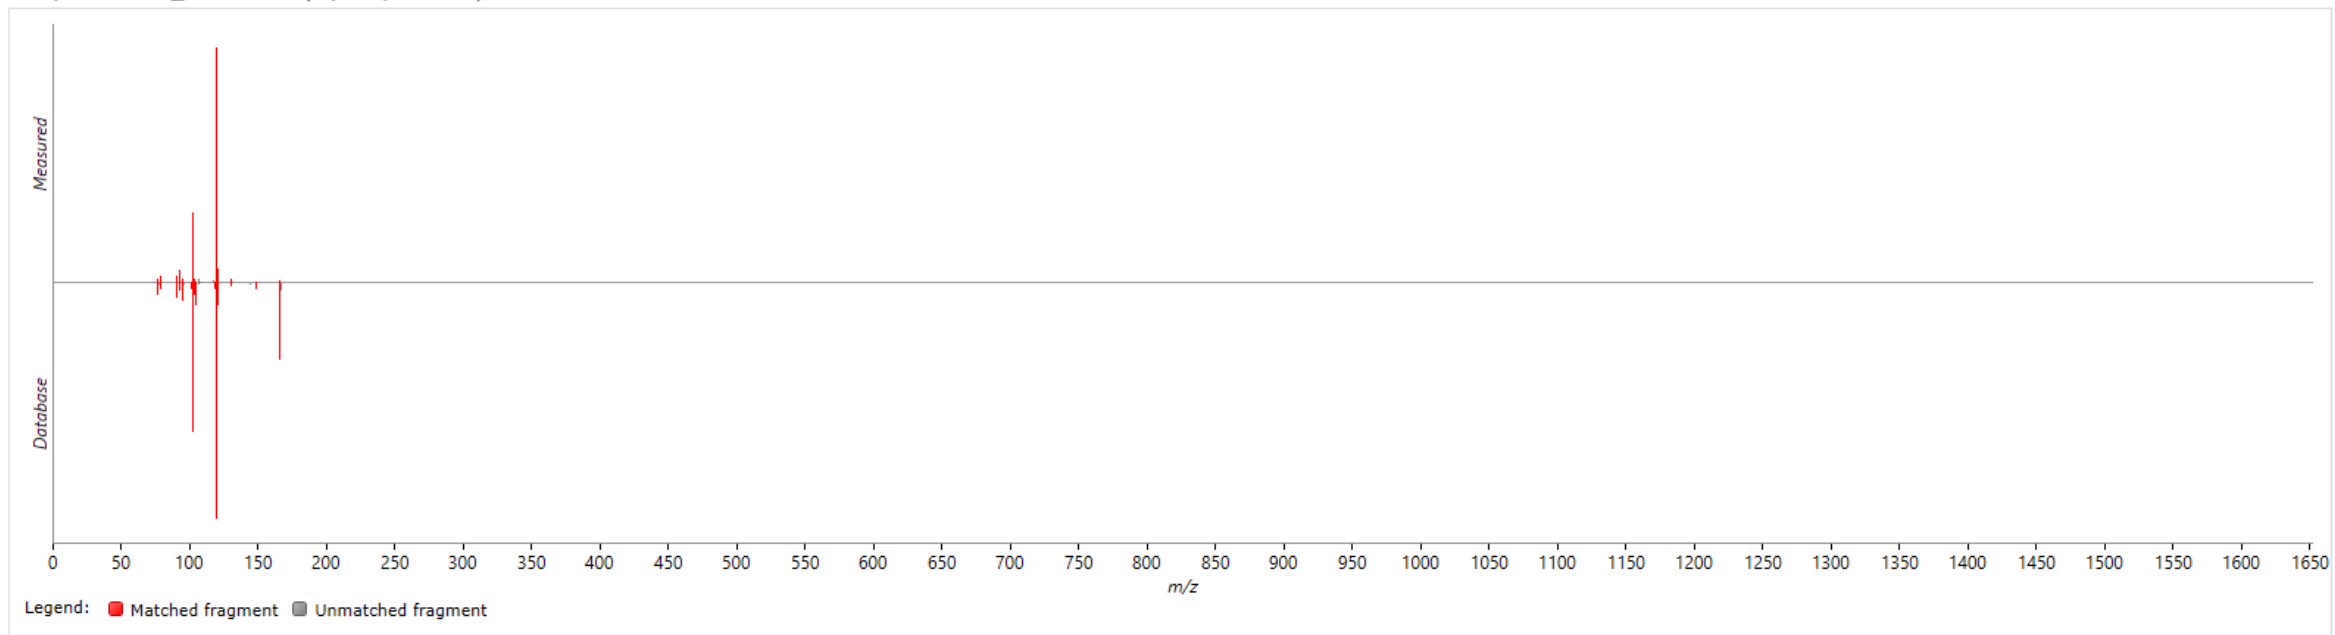

**FIGURE S3B** | MS-MS of L-phenylalanine.

Compound 0.72\_133.0740n (N-Methylthreonine)

Help

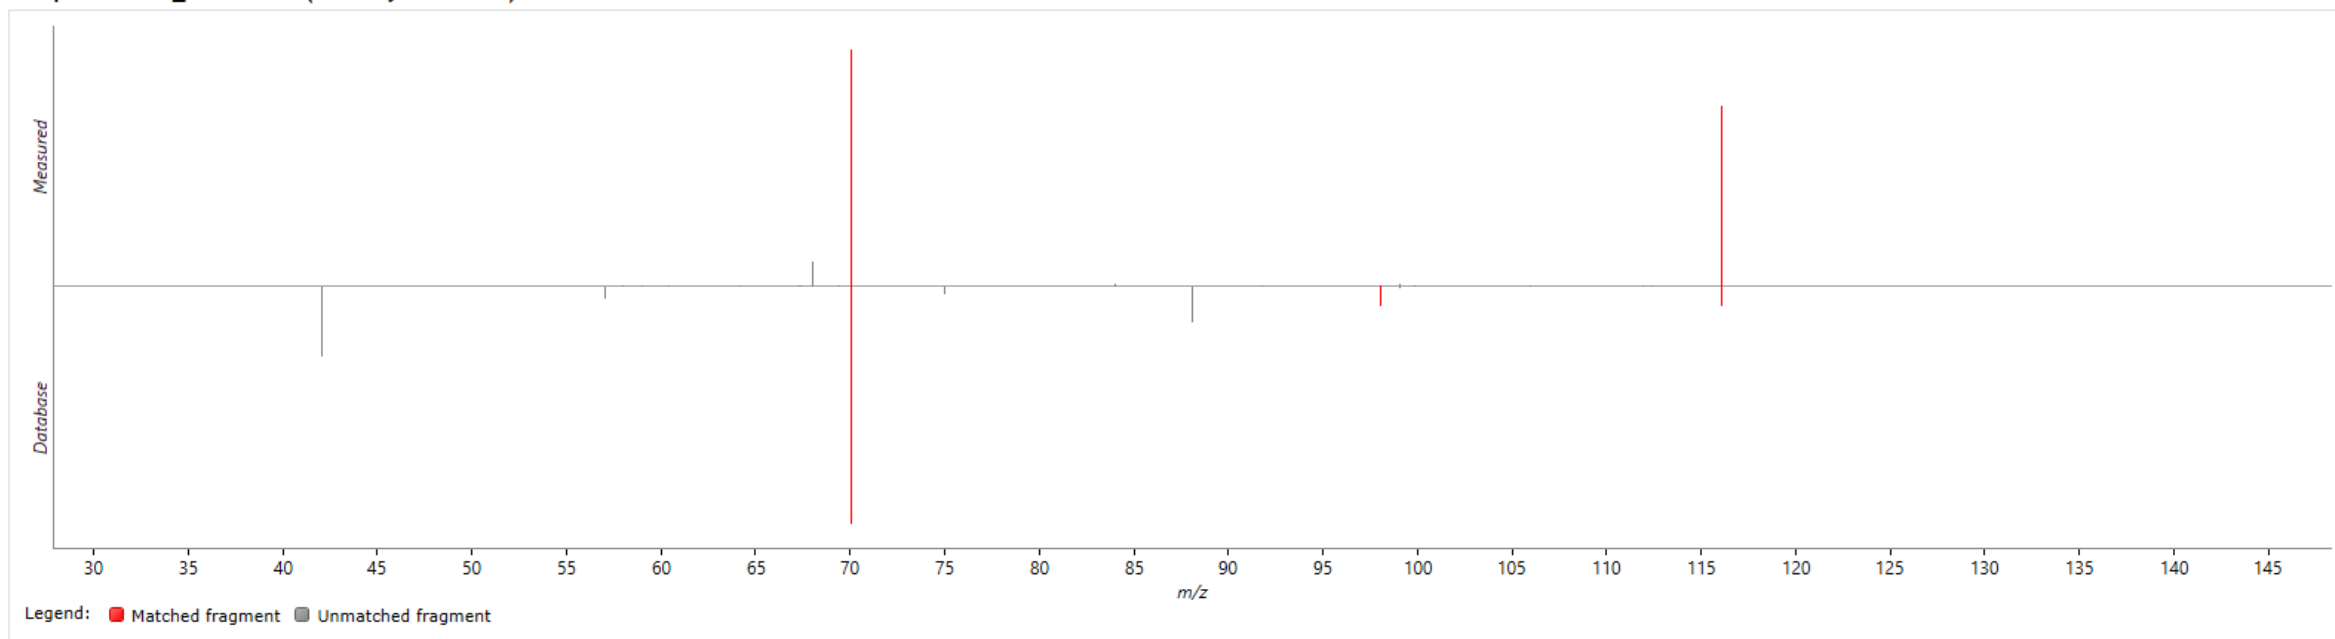

**FIGURE S3C** | MS-MS of N-Methylthreonine.

Compound 9.80\_316.2848m/z Dehydrophytosphingosine

Help

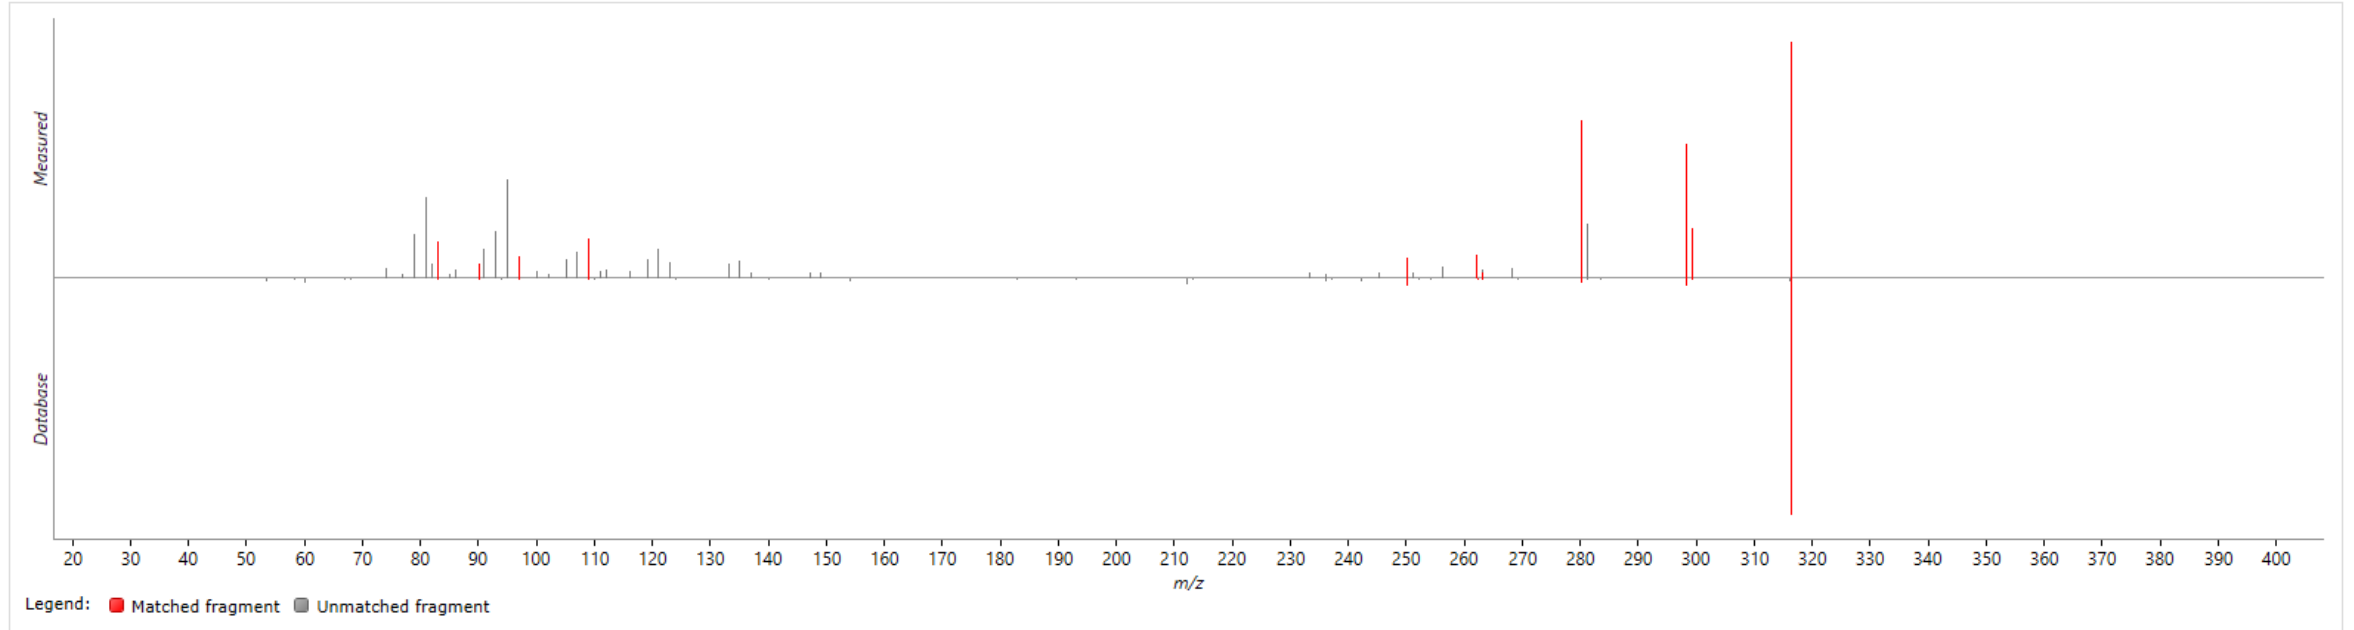

**FIGURE S3D** | MS-MS of Dehydrophytosphingosine.

Compound 11.57\_309.1721m/z ((2S)-2-[(1S)-1-carboxyundecyl]-5-oxotetrahydrofuran-2-carboxylic acid)

Help

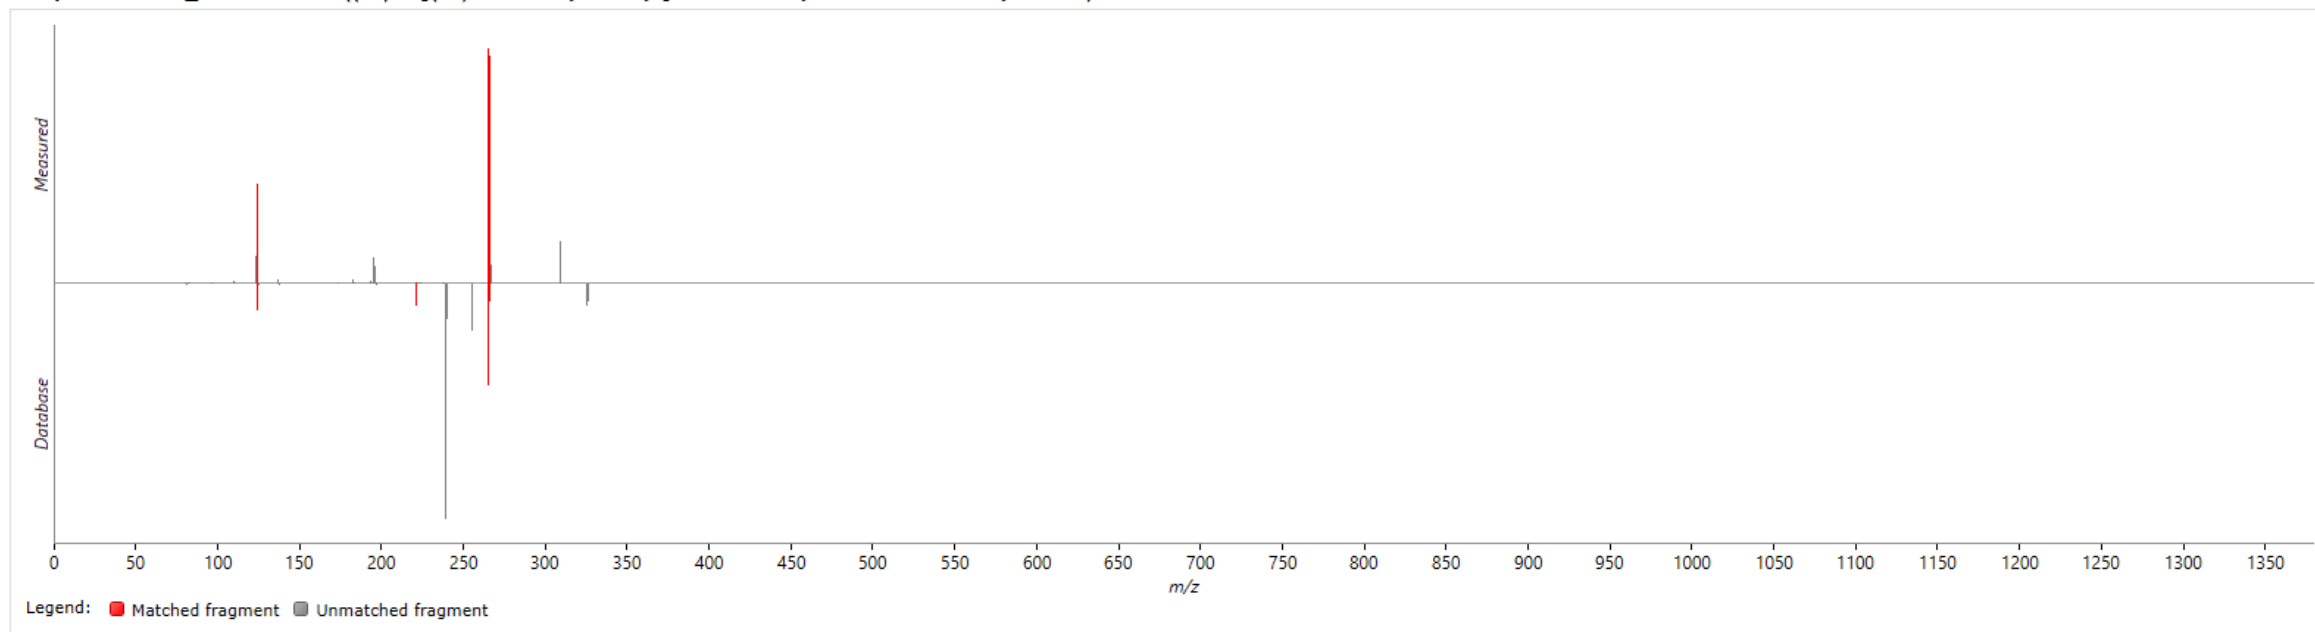

**FIGURE S3E** | MS-MS of ((2S)-2-[(1S)-1-carboxyundecyl]-5-oxotetrahydrofuran-2-carboxylic acid).

Compound 7.72\_166.0631n (3-phenyllactic acid)

Help

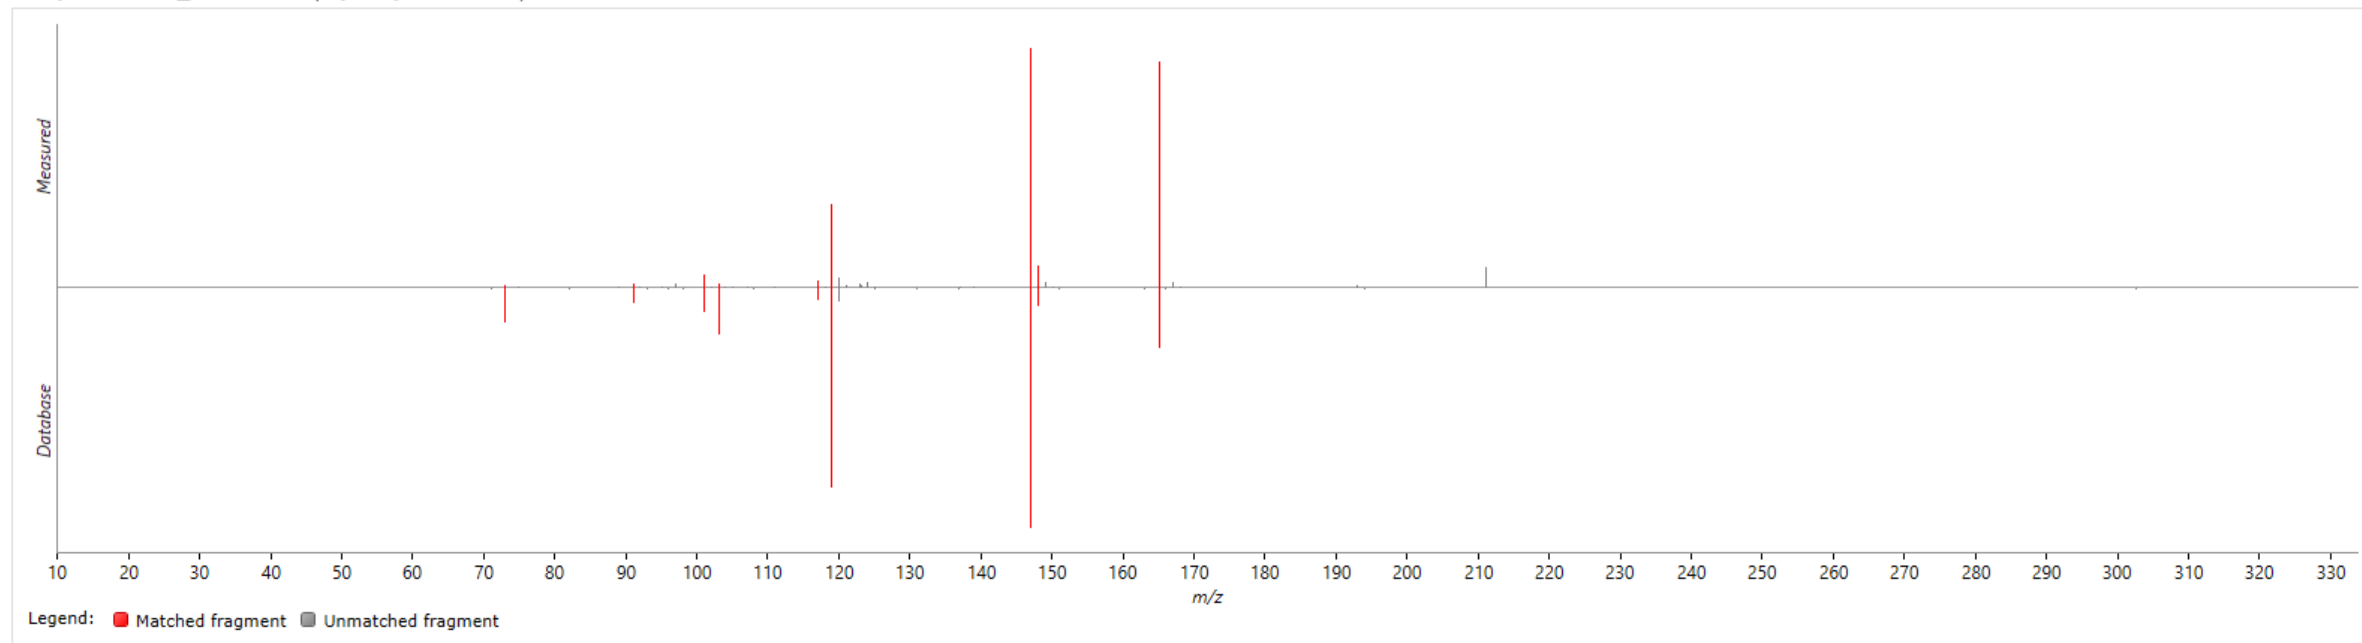

**FIGURE S3F** | MS-MS of 3-phenyllactic acid.

Compound 8.50\_188.1051n (AZELATE)

Help

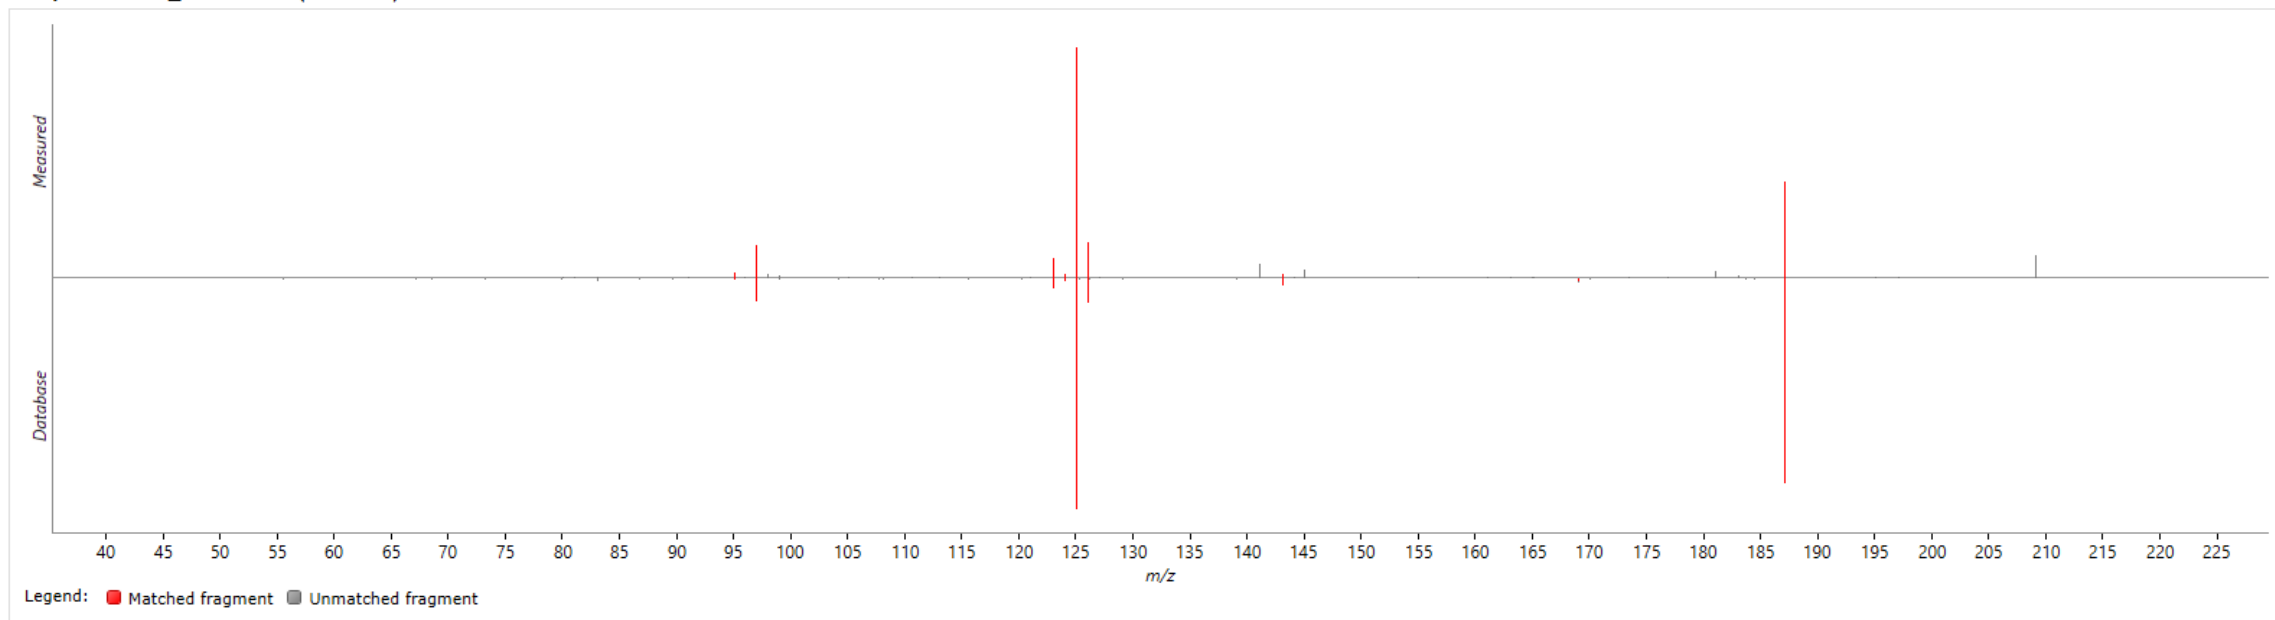

**FIGURE S3G** | MS-MS of AZELATE.



Compound 8.21\_208.0739n (3,5-Dimethoxycinnamic acid)

Help

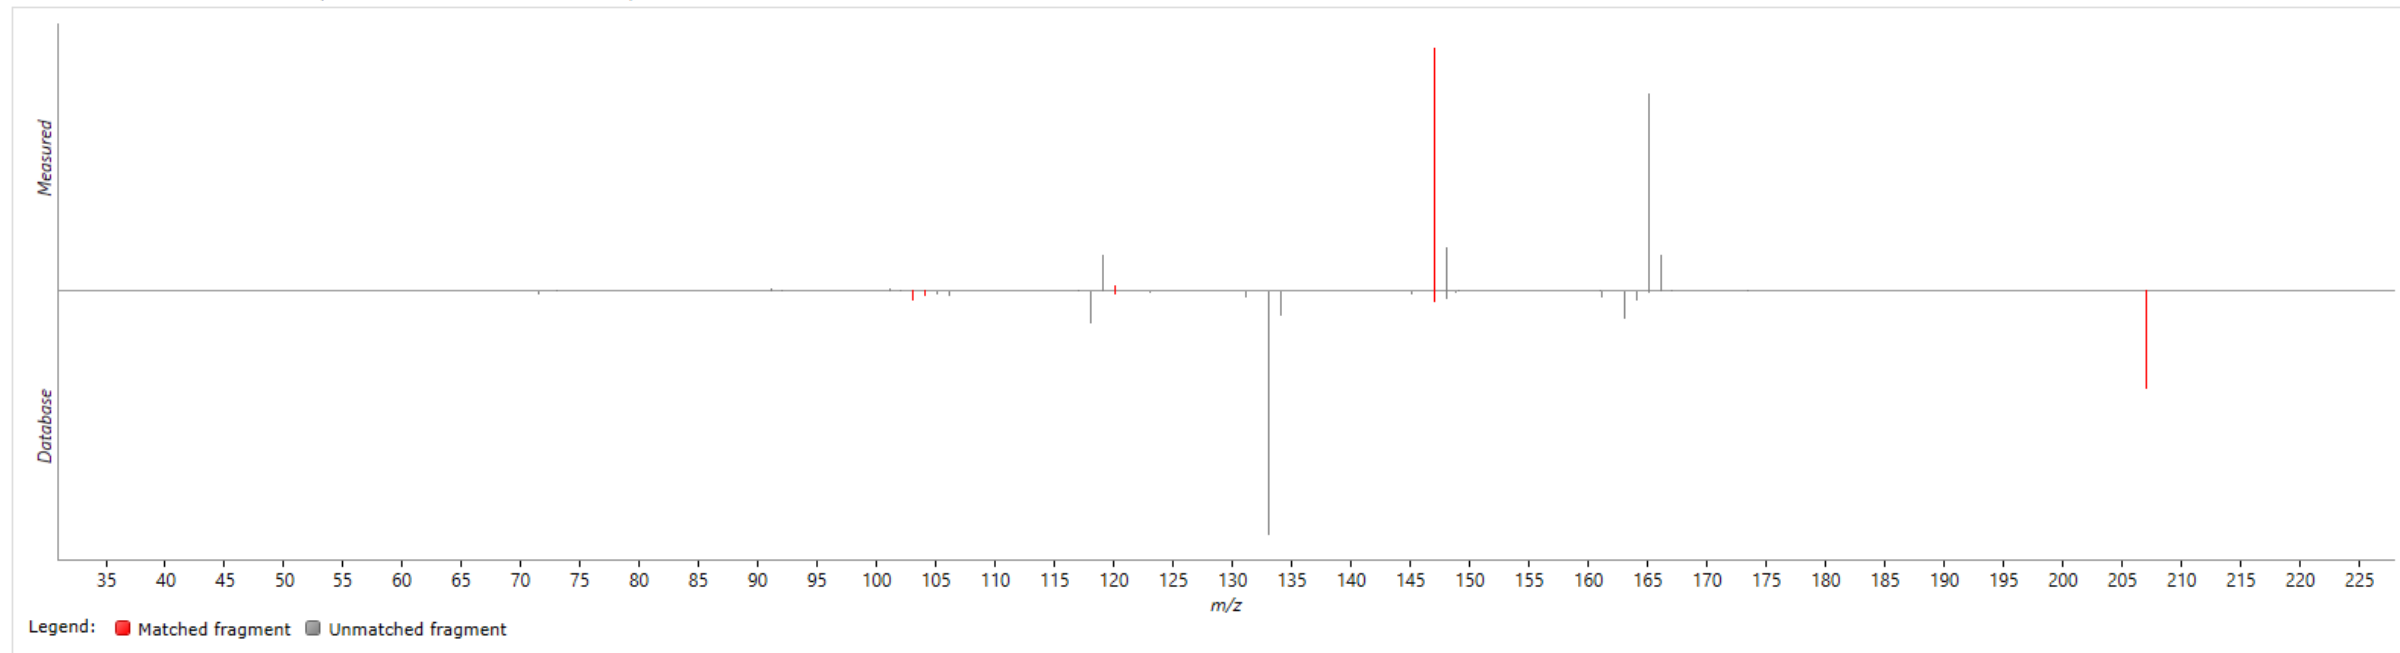

FIGURE S3H | MS-MS of 3,5-Dimethoxycinnamic acid.

Compound 8.21\_147.0452m/z (Cinnamic acid)

[Help](#)

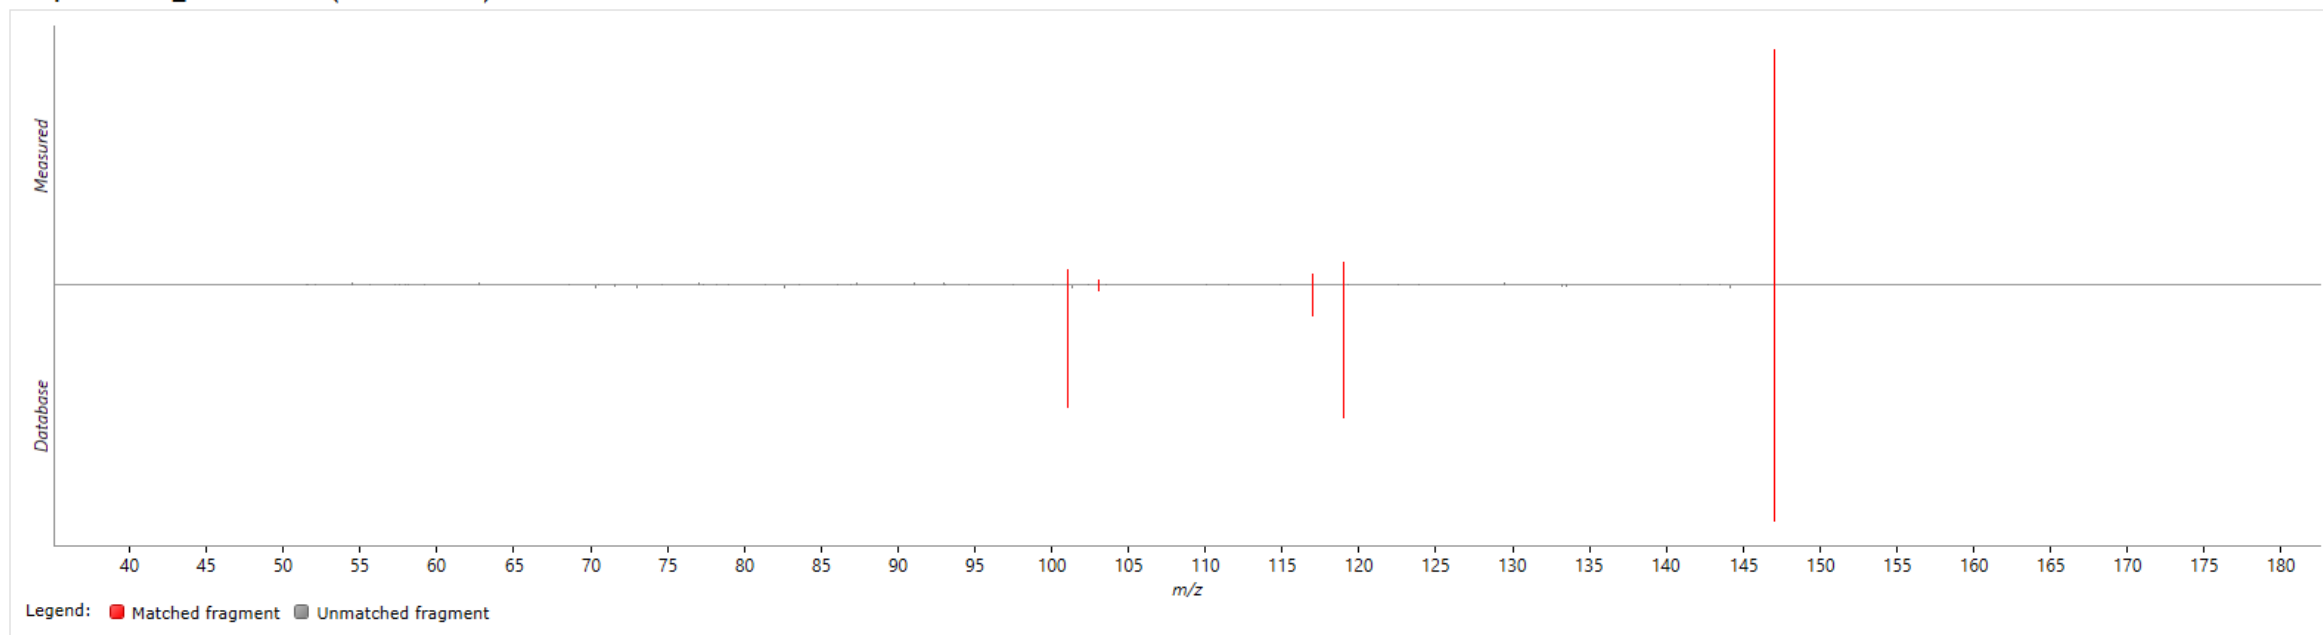

**FIGURE S3I** | MS-MS of Cinnamic acid.
